# Supplementary material
Source: PubMed Central journal article supplement (PMC5927587)
Supplement: NIHMS927008-supplement-1.pdf [file NIHMS927008-supplement-1.pdf]

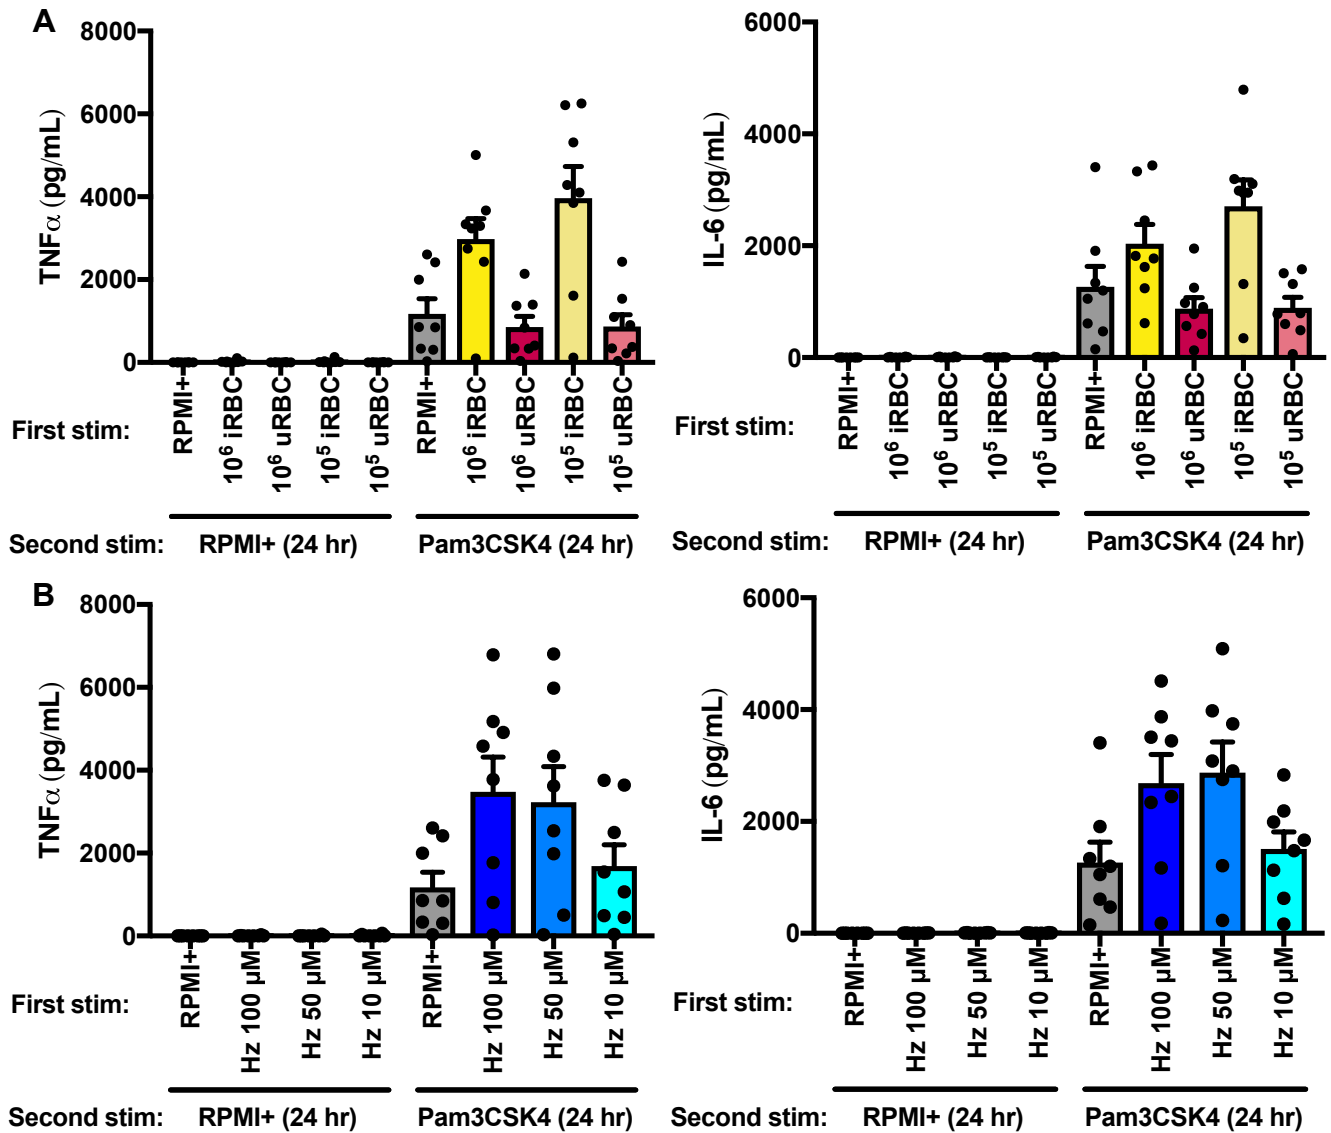

**Supplemental Figure 1.** *P. falciparum* iRBCs and Hz induce trained immunity. (A and B) TNF $\alpha$  and IL-6 ELISA measurements of supernatants from adherent PBMCs trained with iRBCs (A) or Hz (B) for 24 hr, rested for 3 d, then challenged with RPMI+ (media-only control) or Pam3CSK4 for 24 h. Bars represent mean  $\pm$  SEM for eight donors.

| Cohort 1 | Cohort 2 | Cohort 3 | Cohort 4 | Cohort 5 | Cohort 6      |
|----------|----------|----------|----------|----------|---------------|
| IL5      | C1S      | CSF2     | OXER1    | MAPK8    | MEF2BNB-MEF2B |
| IL13     | IL2      | PTGS2    | HSH2D    | IL10     | CCL5          |
| CCL4     | CSF1     | IL1R1    | CD4      | DDIT3    | CD40LG        |
| TNFSF14  | CCL21    | CCL16    | IL1RAP   | TLR1     | IL18RAP       |
| CXCL9    | ITGB2    | CSF3     | ALOX5    | ROCK2    | MAP2K6        |
| TNF      | C1QA     | MMP3     | LY96     | SHC1     | TCF4          |
| CCL19    | MMP9     | MAP2K1   | CCL2     | BCL6     | CCR7          |
| IL21     | LIMK1    | MAPKAPK2 | CD163    | TLR6     | PTGER4        |
| IL23R    | FOS      | IL12B    | TYROBP   | RAF1     | CYSLTR1       |
| C1R      | CEBPB    | TNFAIP3  | PTGDR2   | MAPK14   | DEFA1         |
| CRP      | CCR1     | MAFK     | HSPB1    | NFATC3   | MYC           |
| PTGIR    | MRC1     | IL15     | NOX1     | MYD88    | HMGB1         |
| C7       | C1QB     | IL6R     | STAT1    | TRADD    | RPS6KA5       |
| C7       | CCL24    | RAPGEF2  | NOD1     | CREB1    | STAT3         |
| IFNG     | TLR2     | NOS2     | PLCB1    | NOD2     | MX2           |
| JUN      | CCL8     | C8A      | TREM2    | PRKCB    | TLR9          |
| CCR4     | CCL13    | C6       | CXCL6    | PDGFA    | HDAC4         |
| AREG     | IL17A    | GNGT1    | CCL7     | C5       | PRKCA         |
| FLT1     | TLR8     | C9       | CFL1     | MEF2A    | MEF2C         |
| CCL3     | KNG1     | OASL     | CYSLTR2  | TGFB2    | IRF3          |
| FXYP2    | CXCL5    | TBXA2R   | CCL23    |          | HMG1          |
| C8B      | IL1A     | BCL2L1   | MAPK3    |          | PTGER3        |
| IL23A    | PTGS1    | TGFB1    | CXCR4    |          | IL7           |
| CXCL2    | C3AR1    | CD86     | CD55     |          | RELA          |
| IL8      | CFD      | TSLP     |          |          | STAT2         |
| IL6      | C3       |          |          |          | MAP3K5        |
| IL9      | IL1B     |          |          |          | TGFBR1        |
| MBL2     |          |          |          |          | NFKB1         |
| IL11     |          |          |          |          | NR3C1         |
| CXCL3    |          |          |          |          | CDC42         |
| LTB4R    |          |          |          |          | GRB2          |
| CCL20    |          |          |          |          | GNB1          |
| ALOX12   |          |          |          |          | MKNK1         |
| C2       |          |          |          |          | RHOA          |
| MAFF     |          |          |          |          | TGFB3         |
| CFB      |          |          |          |          | LTB4R2        |
| HLA-DRB1 |          |          |          |          | IL12A         |
| HLA-DRA  |          |          |          |          | GNAS          |
| IL18     |          |          |          |          | TLR3          |
| NLRP3    |          |          |          |          | PTK2          |
| RIPK2    |          |          |          |          | LTB           |
| PTGER1   |          |          |          |          | KEAP1         |
| IL1RN    |          |          |          |          | PPP1R12B      |
| IL3      |          |          |          |          | HRAS          |
| IFNA1    |          |          |          |          | DAXX          |
| PTGFR    |          |          |          |          | IRF5          |
|          |          |          |          |          | MAPK1         |
|          |          |          |          |          | MAP2K4        |
|          |          |          |          |          | MAPKAPK5      |
|          |          |          |          |          | BIRC2         |
|          |          |          |          |          | MAP3K7        |
|          |          |          |          |          | RELB          |
|          |          |          |          |          | RIPK1         |
|          |          |          |          |          | MAX           |
|          |          |          |          |          | AGER          |
|          |          |          |          |          | TRAF2         |
|          |          |          |          |          | MAP3K1        |

**Supplemental Table I.** Listing of the transcripts in each cohort of the NanoString hierarchical clustering analysis found in Figure 2C.
